# Supplementary material for: Synthesis, characterization and association behavior of linear-dendritic amphiphilic diblock copolymers based on poly(ethylene oxide) and a dendron derived from 2,2′-bis(hydroxymethyl)propionic acid
Source: Royal Society of Chemistry journal article supplement (doi:10.1039/c4py01385a), 2015-01-01
Supplement: c4py01385a1.pdf [file c4py01385a1.pdf]

# Synthesis, characterization and association behavior of linear-dendritic amphiphilic diblock copolymers based on poly(ethylene oxide) and a dendron derived from 2,2'-bis(hydroxymethyl)propionic acid

Weiwei Zhang, Weiwei Jiang, Delong Zhang, Guangyue Bai,\* Pengxiao Lou and Zhiguo Hu\*

*Collaborative Innovation Center of Henan Province for Green Manufacturing of Fine Chemicals, Key Laboratory of Green Chemical Media and Reactions, Ministry of Education, School of Chemistry and Chemical Engineering, Henan Normal University, Xixiang 453007, P. R. China.*

*E-mails: Zhiguo Hu (E-mail: zghu@htu.cn, Tel: +86-373-3326335); Guangyue Bai (E-mail: baiguangyue@htu.cn, Tel: +86-373-3328622).*

## Table of contents

|                                                                                                                                                                             |        |
|-----------------------------------------------------------------------------------------------------------------------------------------------------------------------------|--------|
| I. $^1\text{H}$ and $^{13}\text{C}$ NMR Spectra of the Synthesized Compounds.....                                                                                           | S2-9   |
| II. Fluorescence spectra for PEO-b-G3-( $\text{C}_{18}\text{H}_{35}\text{O}_2$ ) $_8$ and PEO-b-G3-( $\text{C}_2\text{H}_3\text{O}_2$ ) $_8$ ...                            | S10    |
| III. Determination of Micellar Aggregation Numbers of PEO-b-G3-( $\text{C}_{18}\text{H}_{35}\text{O}_2$ ) $_8$ and PEO-b-G3-( $\text{C}_2\text{H}_3\text{O}_2$ ) $_8$ ..... | S10-11 |

# I. <sup>1</sup>H and <sup>13</sup>C NMR Spectra of the Synthesized Compounds

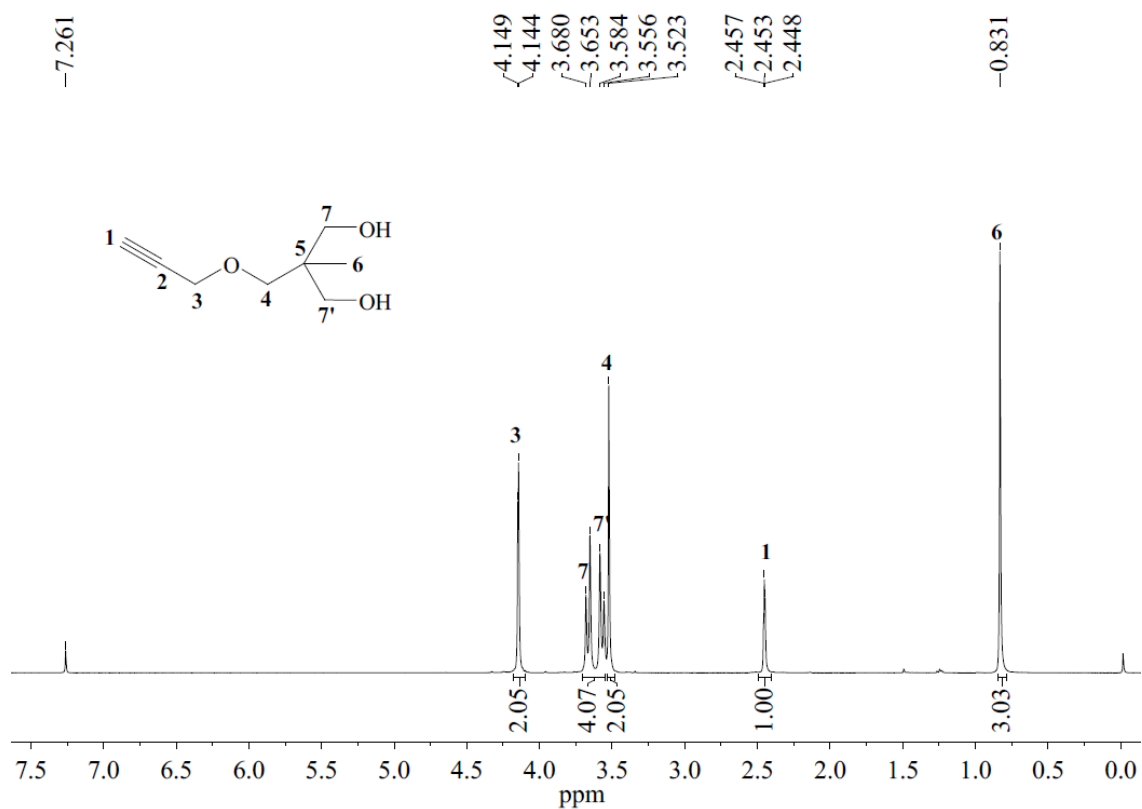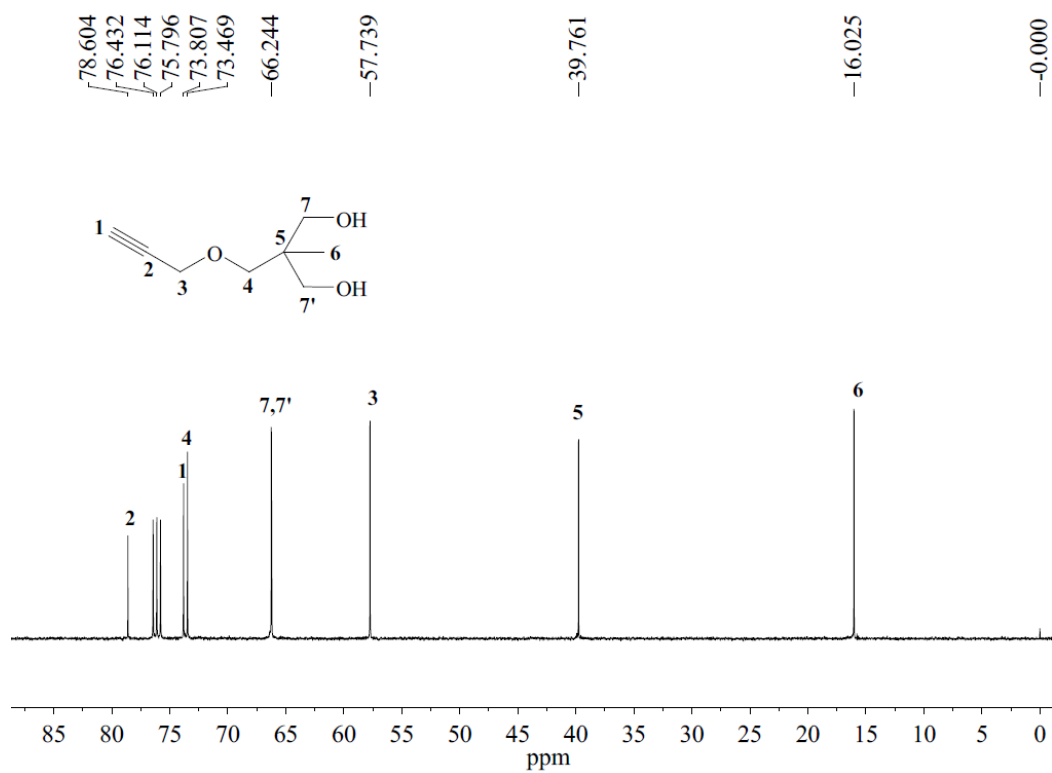

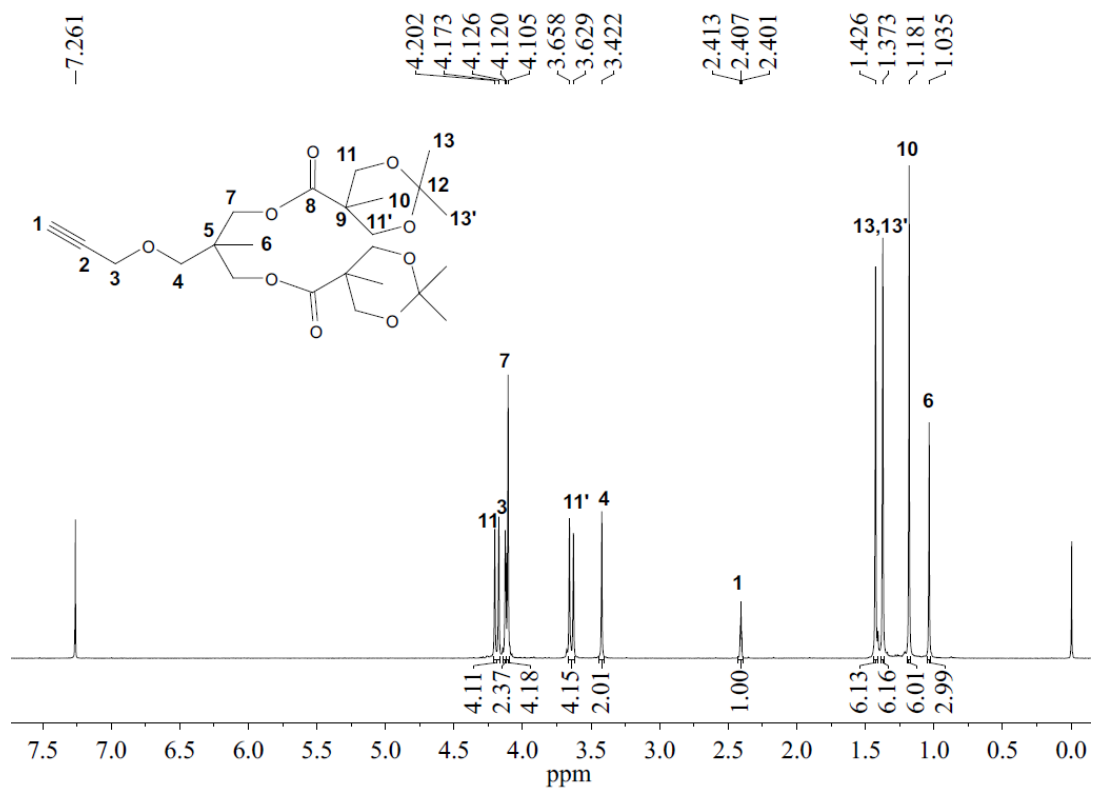

$^1\text{H}$  NMR Spectrum of Compound 5

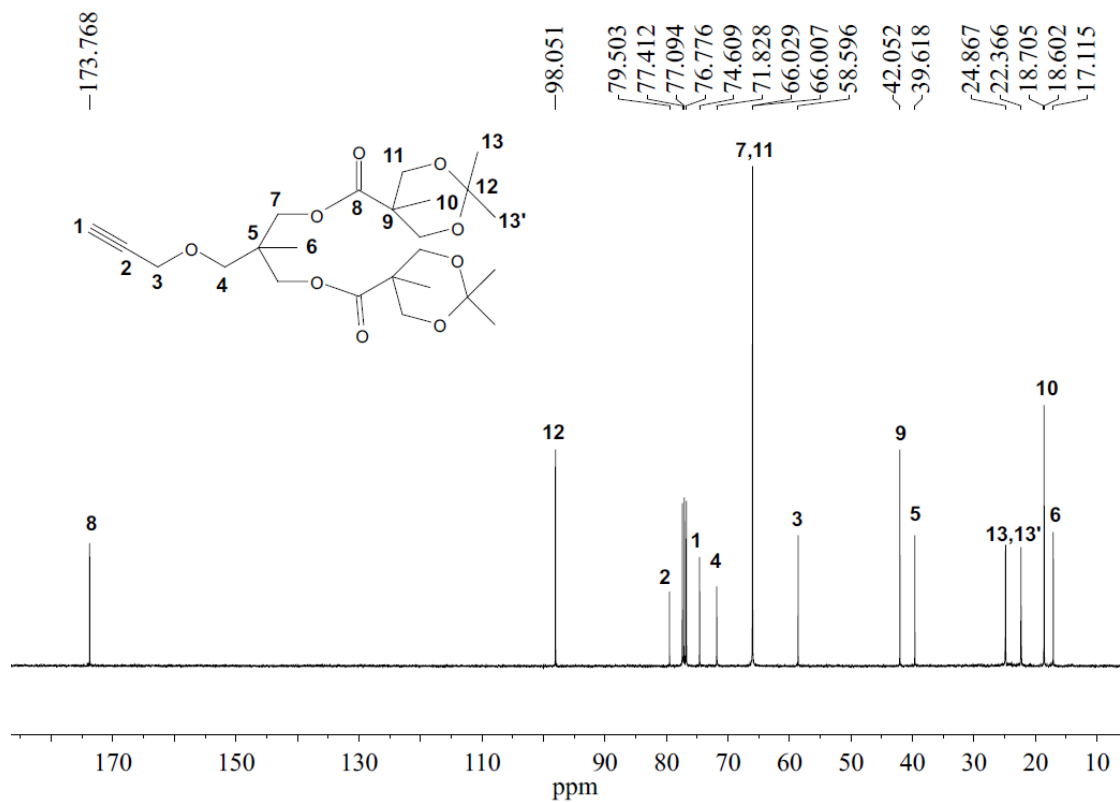

$^{13}\text{C}$  NMR Spectrum of Compound 5

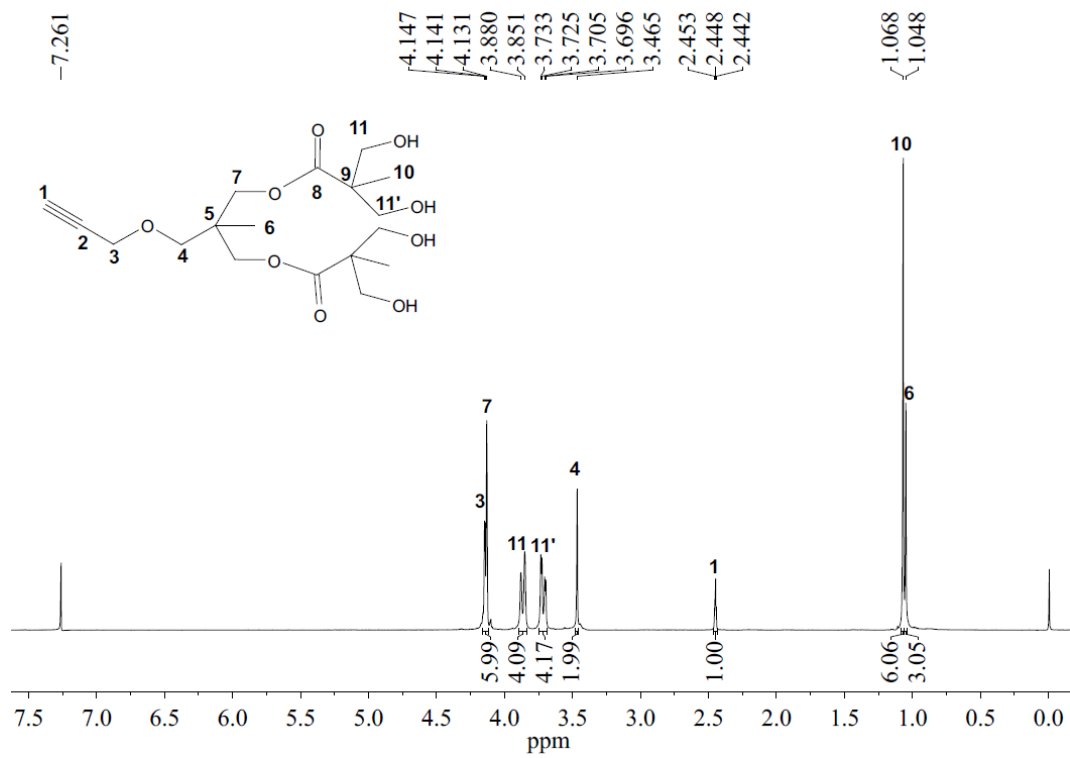

<sup>1</sup>H NMR Spectrum of Compound 6

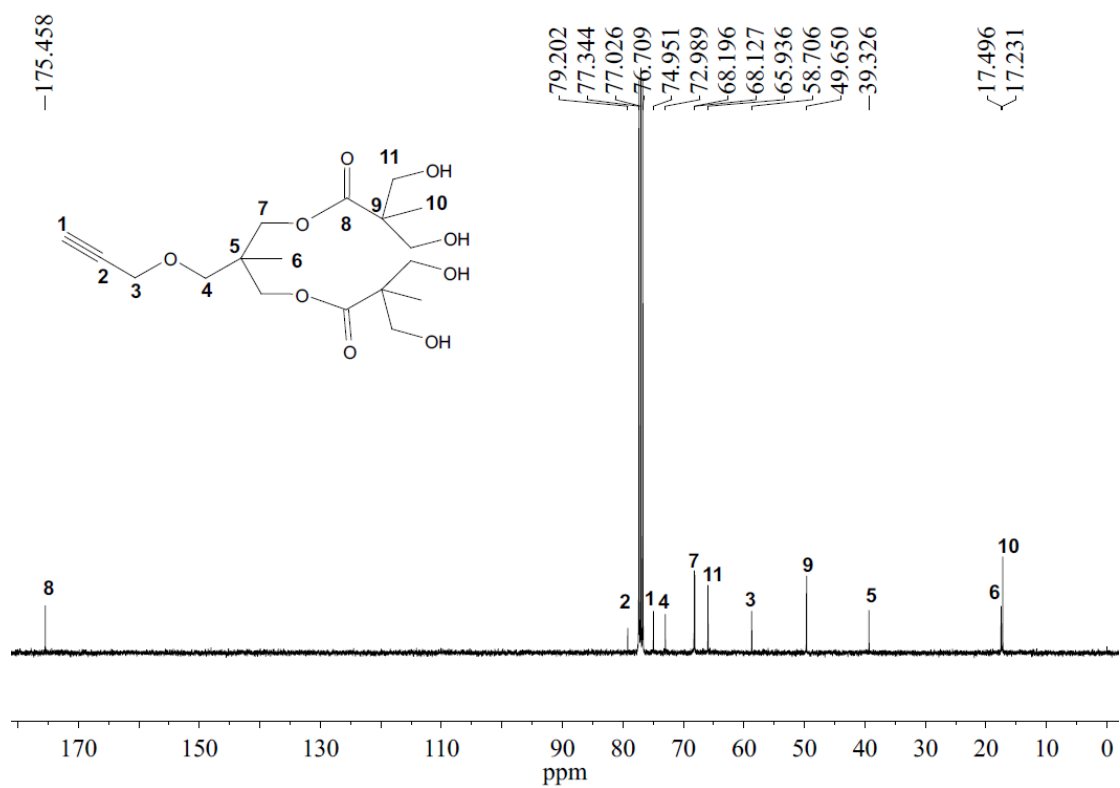

<sup>13</sup>C NMR Spectrum of Compound 6

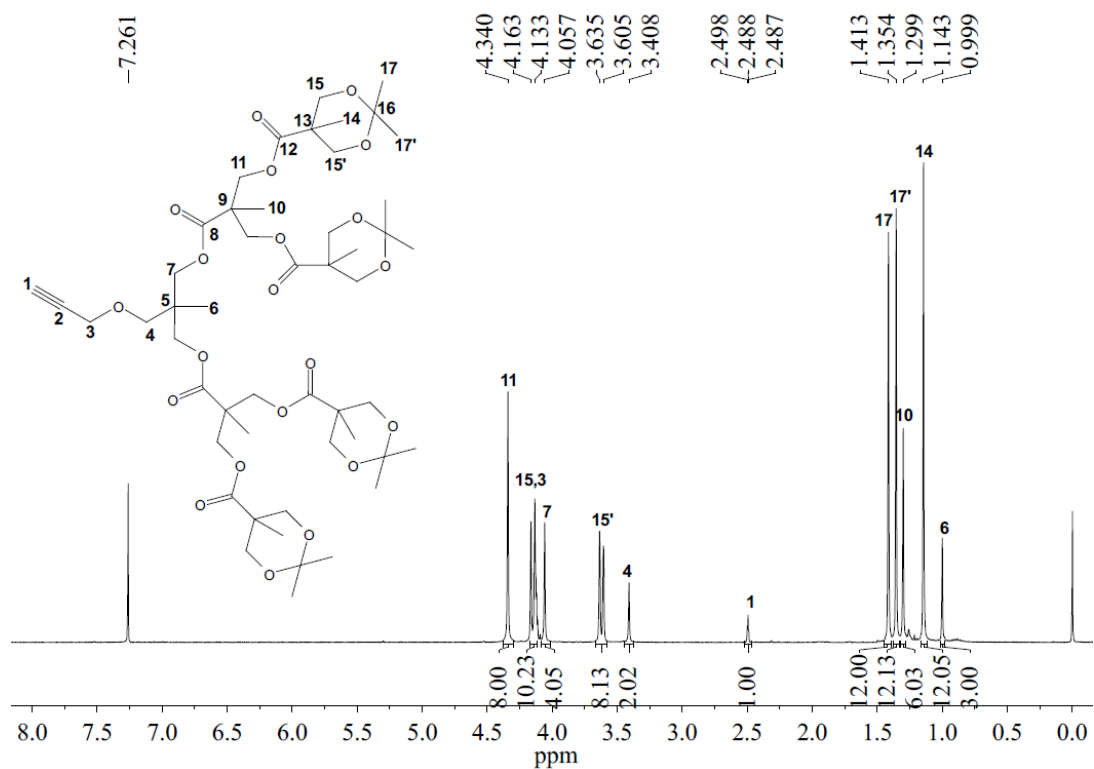

<sup>1</sup>H NMR Spectrum of Compound 7

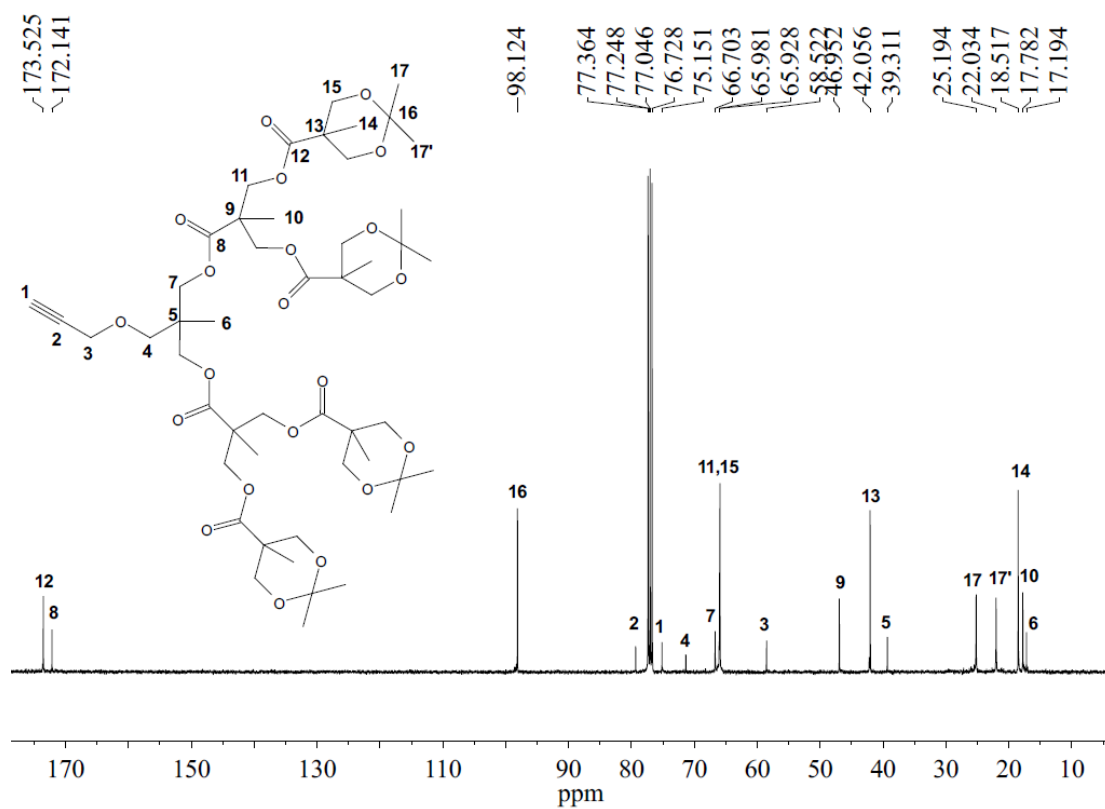

<sup>13</sup>C NMR Spectrum of Compound 7

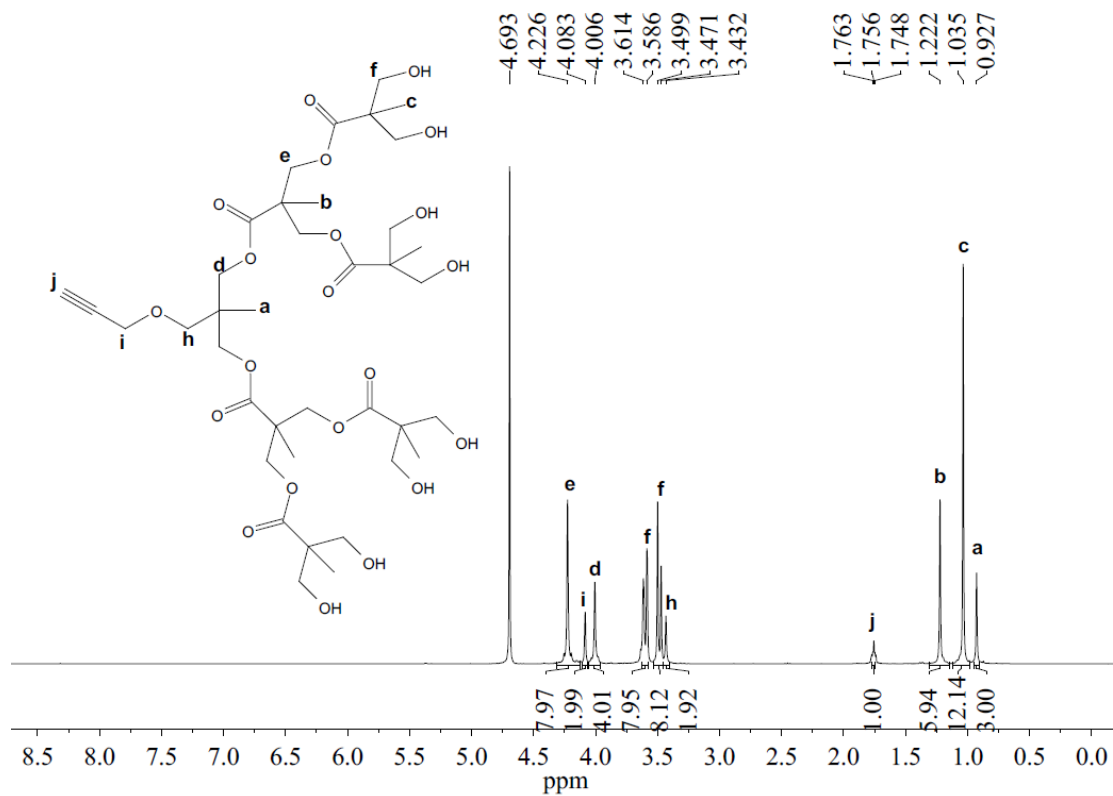

$^1\text{H}$  NMR Spectrum of Compound 8

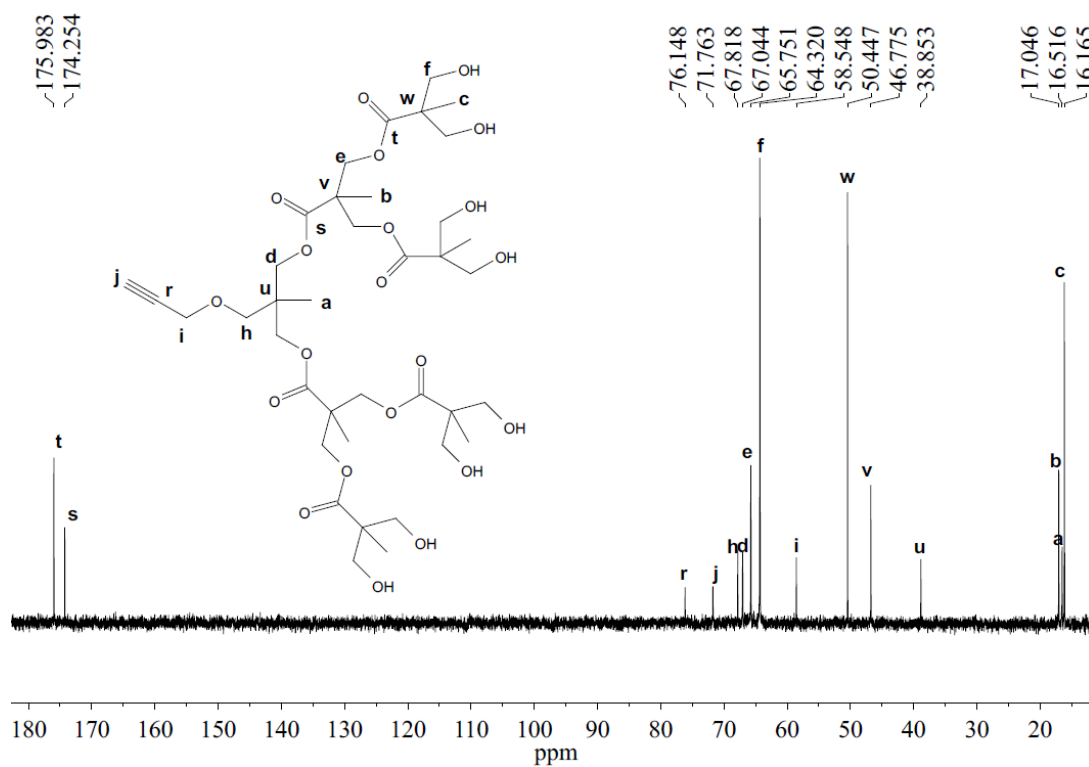

$^{13}\text{C}$  NMR Spectrum of Compound 8

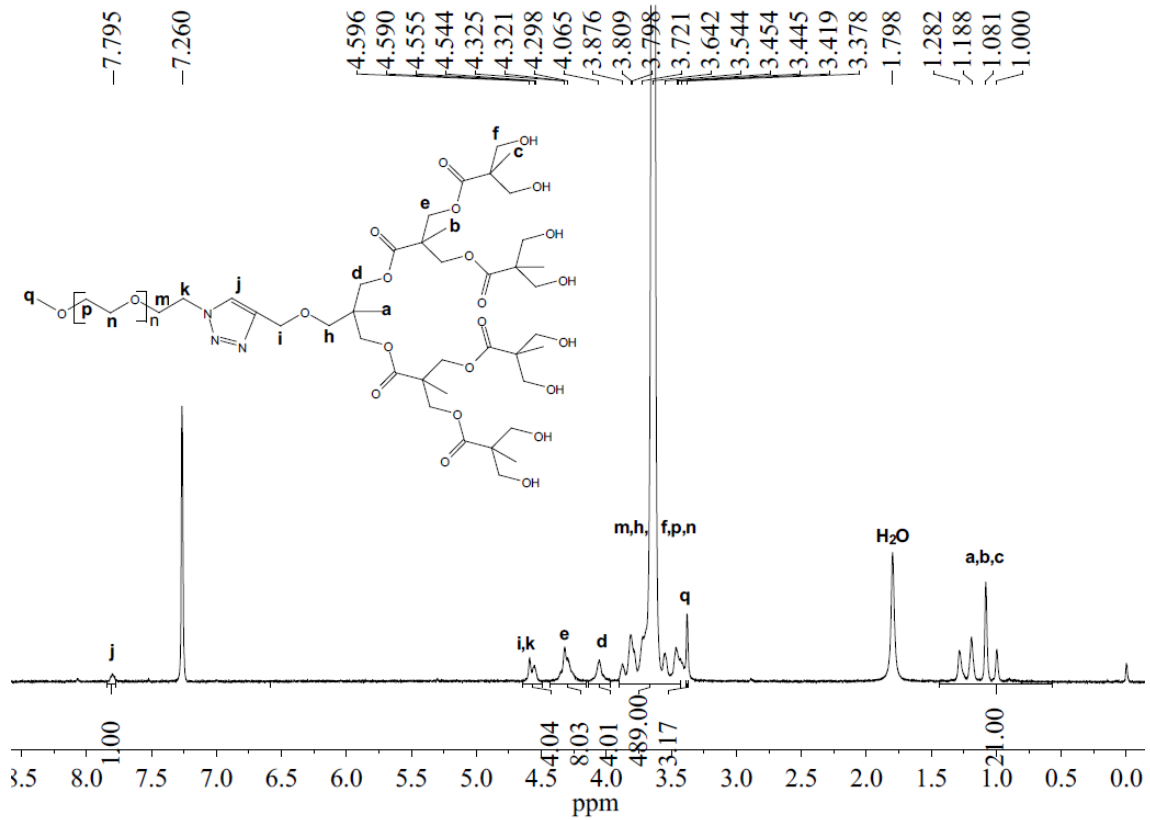

$^1\text{H}$  NMR Spectrum of Compound 10

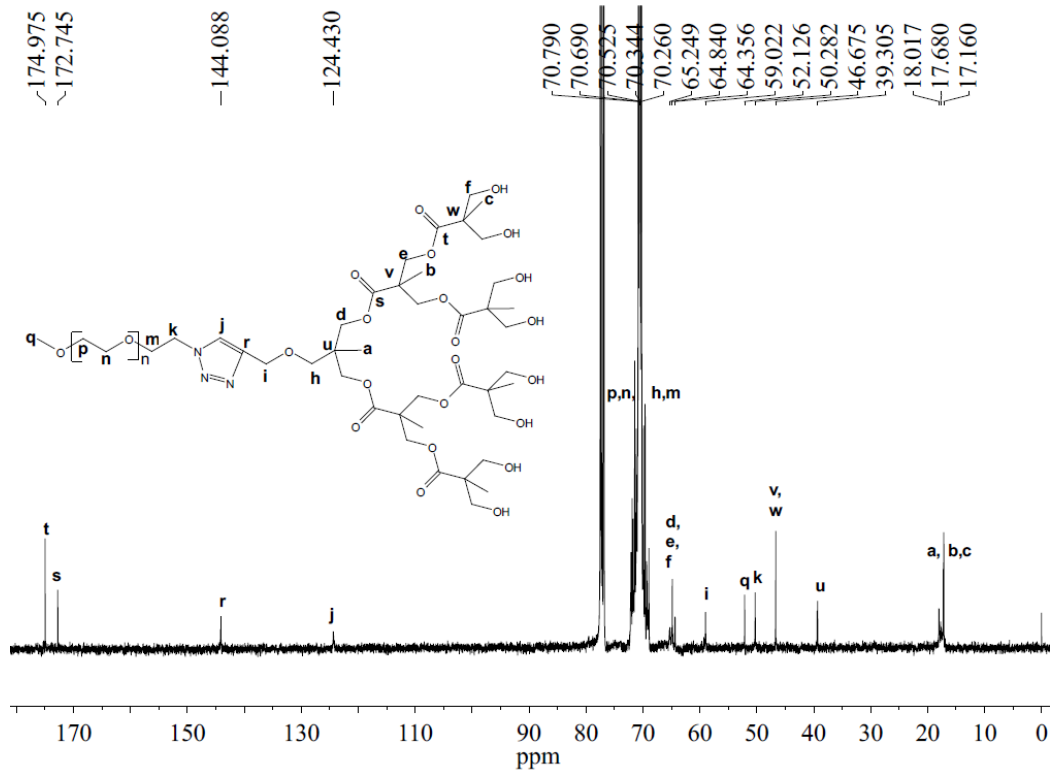

$^{13}\text{C}$  NMR Spectrum of Compound 10

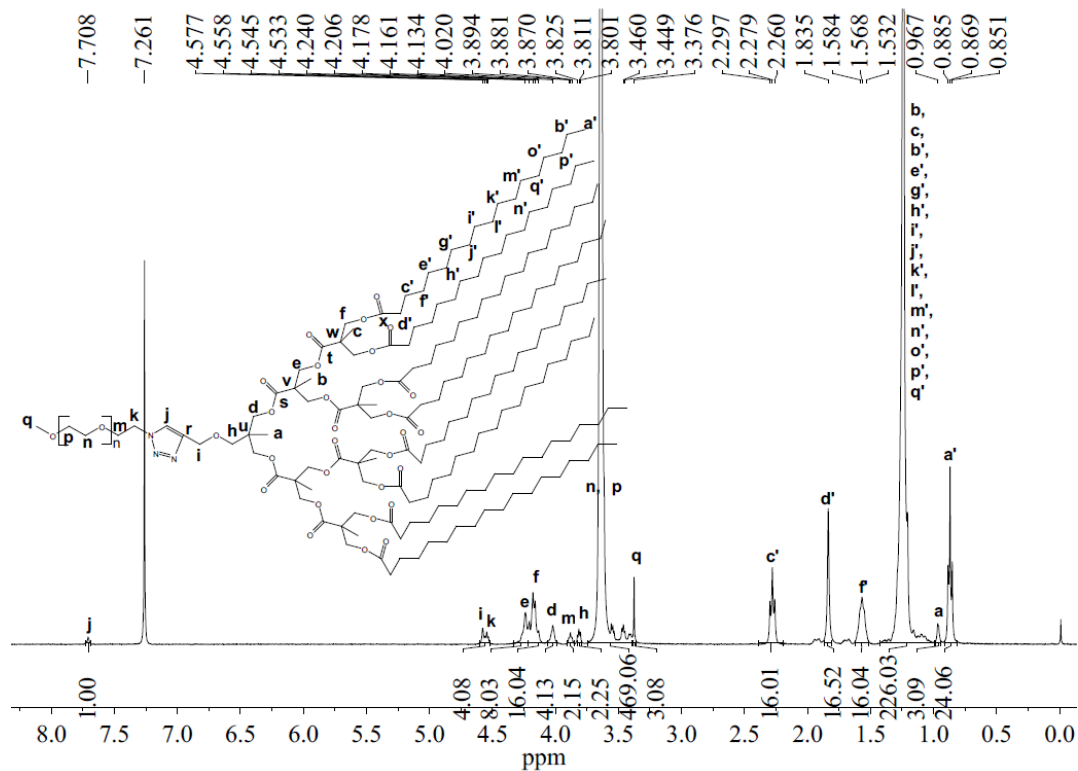

<sup>1</sup>H NMR Spectrum of Compound 11

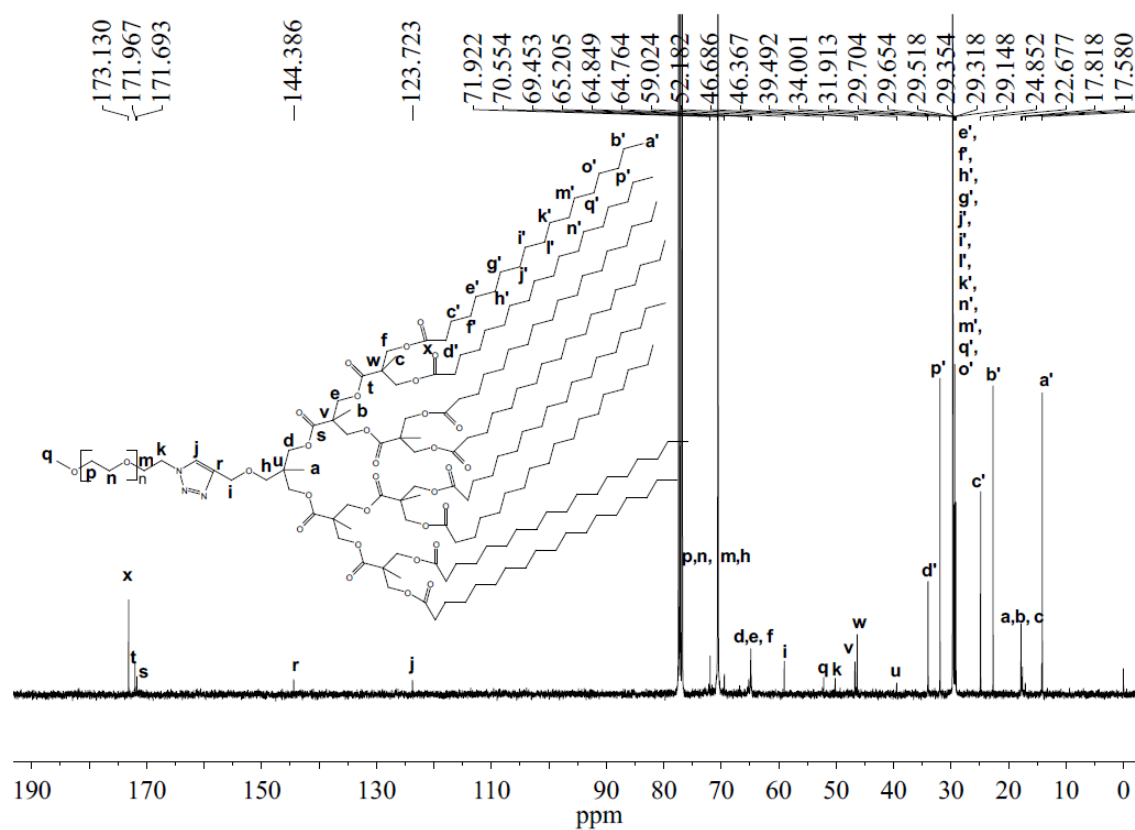

<sup>13</sup>C NMR Spectrum of Compound 11



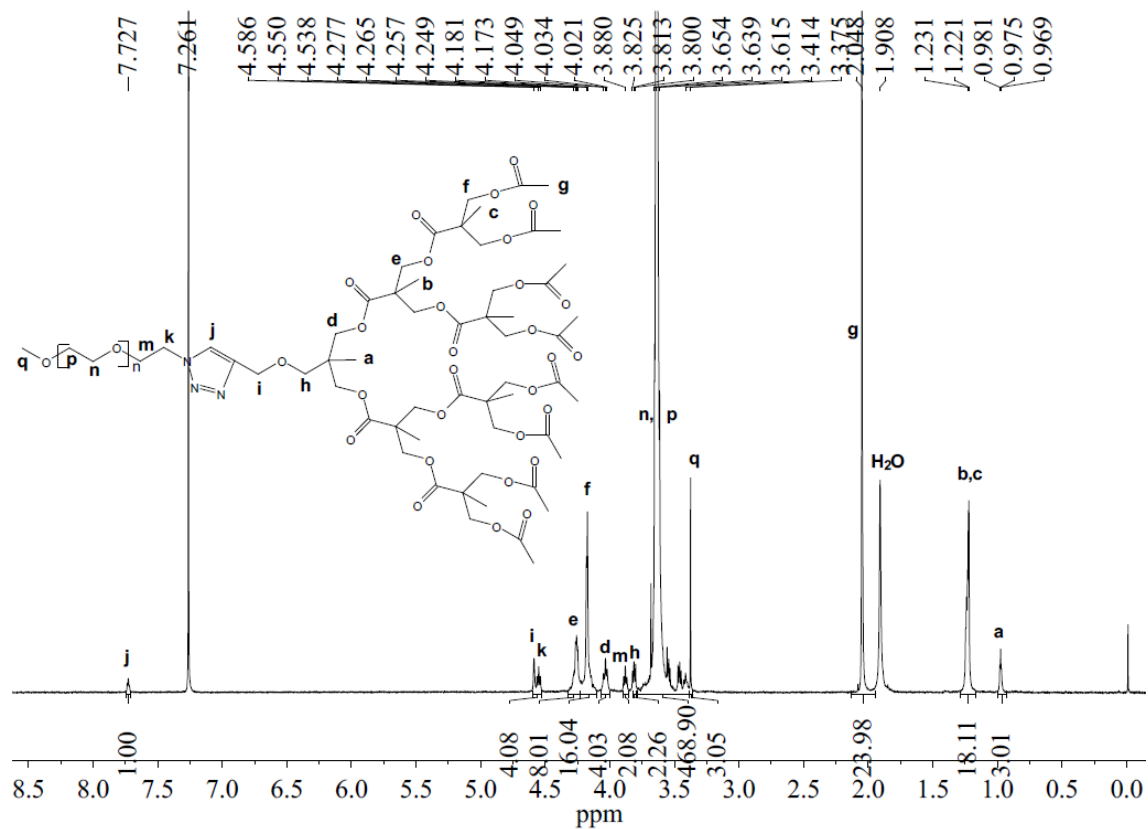

<sup>1</sup>H NMR Spectrum of Compound 12

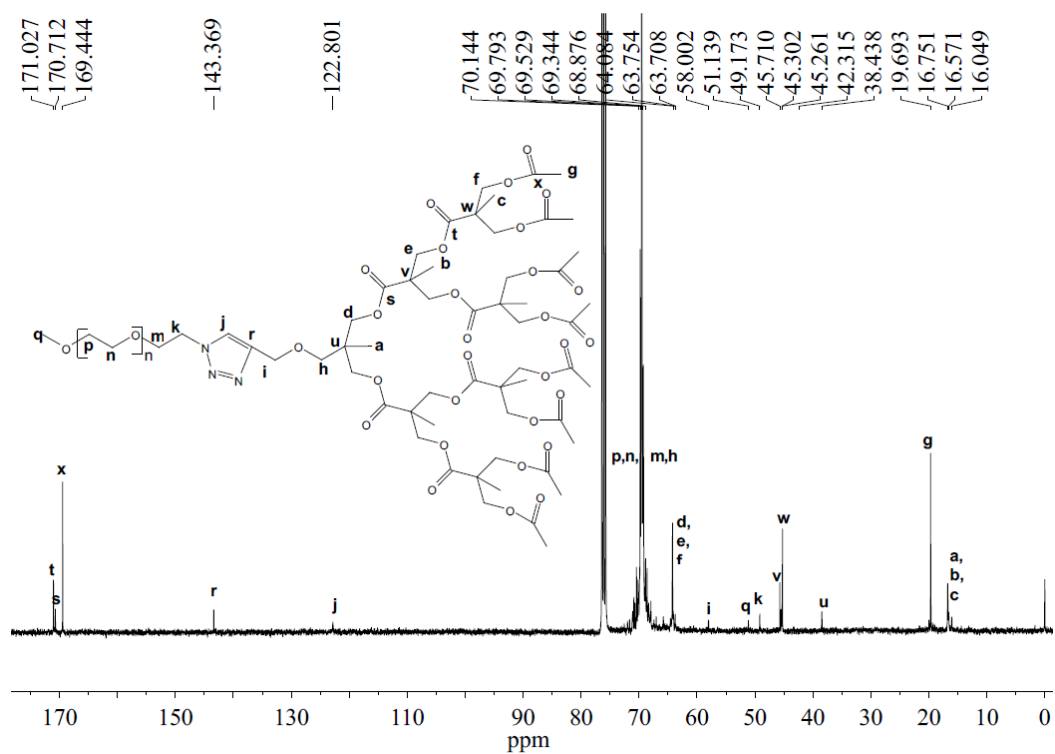

<sup>13</sup>C NMR Spectrum of Compound 12

## II. Fluorescence spectra for PEO-b-G3-(C<sub>18</sub>H<sub>35</sub>O<sub>2</sub>)<sub>8</sub> and PEO-b-G3-(C<sub>2</sub>H<sub>3</sub>O<sub>2</sub>)<sub>8</sub>

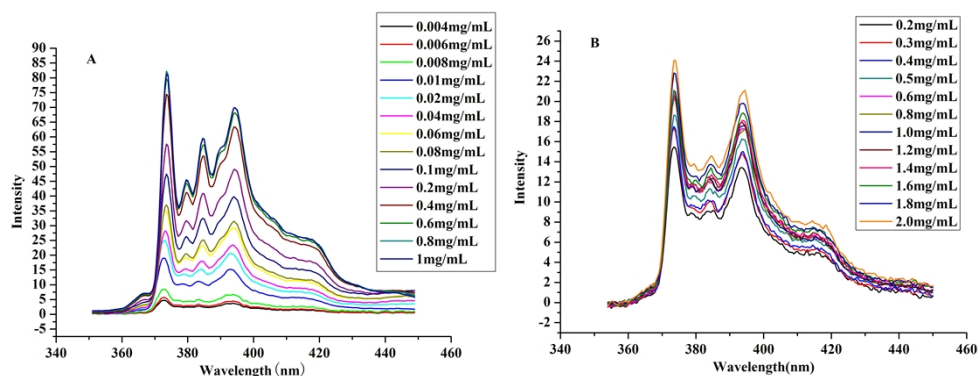

SI-**Fig.1.** Steady-state fluorescence excitation spectra monitored at for the pyrene probe in an aqueous solution of PEO-b-G3-(C<sub>18</sub>H<sub>35</sub>O<sub>2</sub>)<sub>8</sub> (A) and PEO-b-G3-(C<sub>2</sub>H<sub>3</sub>O<sub>2</sub>)<sub>8</sub> (B) at various concentration at 25 °C.

## III. Determination of Micellar Aggregation Numbers of PEO-b-G3-(C<sub>18</sub>H<sub>35</sub>O<sub>2</sub>)<sub>8</sub> and PEO-b-G3-(C<sub>2</sub>H<sub>3</sub>O<sub>2</sub>)<sub>8</sub>

### The Experimental Procedures

The pyrene solution in acetone ( $6 \times 10^{-4}$  M, prepared prior to use) was added to the 100 mL volumetric flask and the acetone was removed at reduced pressure at 35 °C for 2 h. Then the solution of PEO(5k)-b-G3-(C<sub>18</sub>H<sub>35</sub>O<sub>2</sub>)<sub>8</sub> (1mg/mL) was added to the volumetric flask to make solutions with a pyrene concentration of  $6 \times 10^{-7}$  M. In addition, the different volumes of cetylpyridinium chloride (CPC) solution in methanol ( $2 \times 10^{-4}$  M, prepared prior to use) were added to the other series of 10 mL volumetric flasks and the methanol was removed at reduced pressure at 35 °C for 2 h. Finally the solution of PEO(5k)-b-G3-(C<sub>18</sub>H<sub>35</sub>O<sub>2</sub>)<sub>8</sub> including pyrene ( $6 \times 10^{-7}$  M) was added to the series of 10 mL volumetric flasks to make the CPC concentrations from  $0.4 \times 10^{-7}$  M to  $2 \times 10^{-7}$  M.

The solution preparation for PEO(5k)-b-G3-(C<sub>2</sub>H<sub>3</sub>O<sub>2</sub>)<sub>8</sub> (2 mg/mL) was obtained according to the same procedure as that of PEO(5k)-b-G3-(C<sub>18</sub>H<sub>35</sub>O<sub>2</sub>)<sub>8</sub>.

The aggregation numbers for both copolymers in aqueous solution can be calculated by use of eqs 1 and 2:<sup>1-3</sup>

$$\ln\left(\frac{I_0}{I}\right) = \frac{[Q]}{[mic]} \quad (1)$$

$$N_{agg} = \frac{c - cmc}{[mic]} \quad (2)$$

Where  $I_0$  and  $I$  are the emission intensities at a certain wavelength in the absence and presence of the added fluorescence quencher, respectively, and  $[Q]$  is the concentration of the fluorescence quencher.  $[mic]$  is the micellar concentration in solution, and  $c$  is the total concentration of the copolymer.

The emission spectra of these solutions were recorded and the logarithm of the intensity ratio  $I_0/I$  at a specific wavelength (383 nm) was plotted against the quencher concentration  $[Q]$ , according

to eq 1. Thus a straight line through the origin with a slope equal to  $1 / [mic]$  can be determined, and the aggregation number can be calculated according to eq 2.

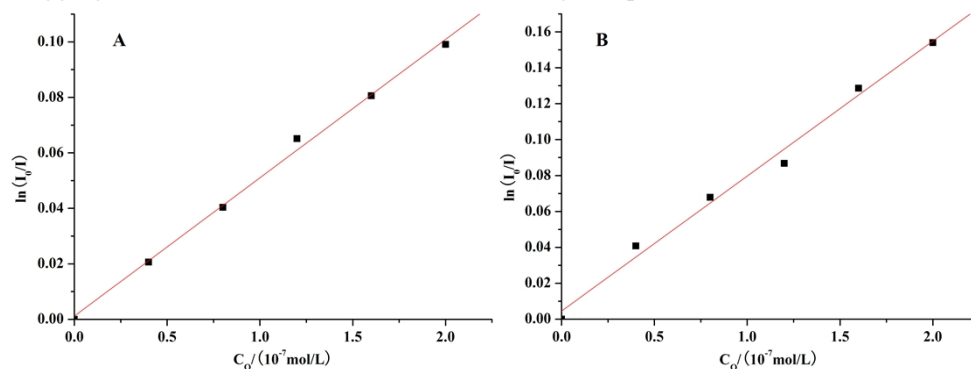

**SI-Fig.2.**  $\ln(I_0/I)$  of pyrene fluorescence intensity as a function of CPC concentration in PEO-b-G3-(C<sub>18</sub>H<sub>35</sub>O<sub>2</sub>)<sub>8</sub> and PEO-b-G3-(C<sub>2</sub>H<sub>3</sub>O<sub>2</sub>)<sub>8</sub> micelles solutions. [Py] =  $6.0 \times 10^{-7}$  M. (A) PEO-b-G3-(C<sub>18</sub>H<sub>35</sub>O<sub>2</sub>)<sub>8</sub> (1 mg/mL), (B) PEO-b-G3-(C<sub>2</sub>H<sub>3</sub>O<sub>2</sub>)<sub>8</sub> (2 mg/mL).

#### References:

1. Ch. Y. Choi, S. Y. Chae, T. H. Kim, J. K. Kweon, Ch. S. Cho, M. K. Jang and J. W. Nah, *J. Appl. Polym. Sci.*, 2006, **99**, 3520-3527.
2. N. J. Turro and A. Yekta, *J. Am. Chem. Soc.*, 1978, **100**, 5951-5952.
3. J. V. Stam, S. Depaemelaere and F. C. D. Schryver, *J. Chem. Educ.*, 1998, **75**, 93-98.
